# Supplementary material for: Knockdown of CKAP2 Inhibits Proliferation, Migration, and Aggregate Formation in Aggressive Breast Cancer
Source: MDPI journal article supplement (doi:10.3390/cancers14153759), 2022-08-02
Supplement: s1 [file s1]

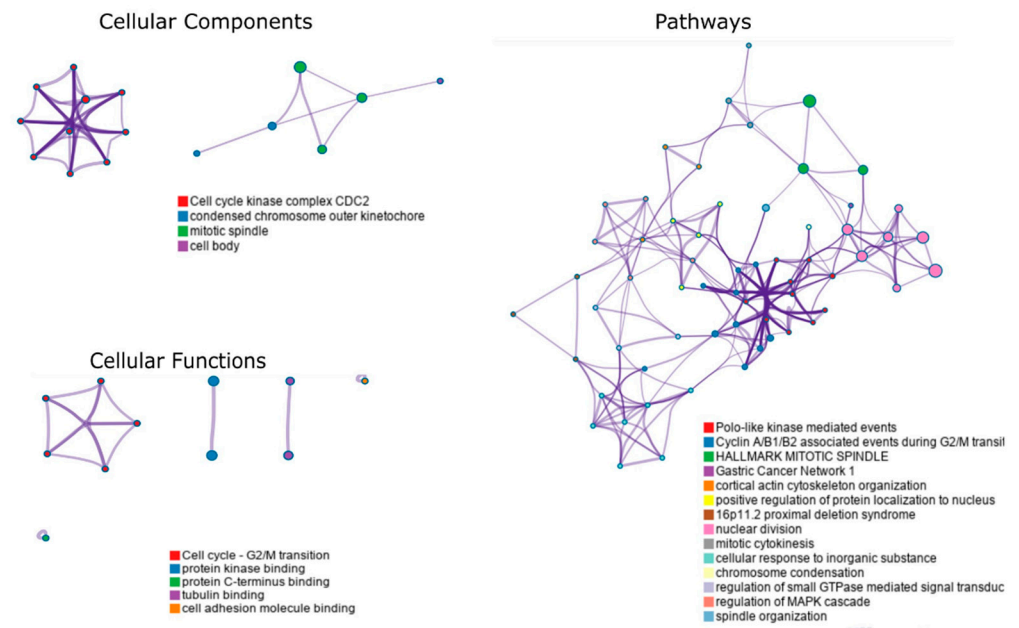

**Figure S1.** Network of enriched terms (from the enrichment analysis of 24 mitotically relevant genes) (from Figure 1) colored by cluster ID, where nodes that share the same cluster ID are typically close to each other.

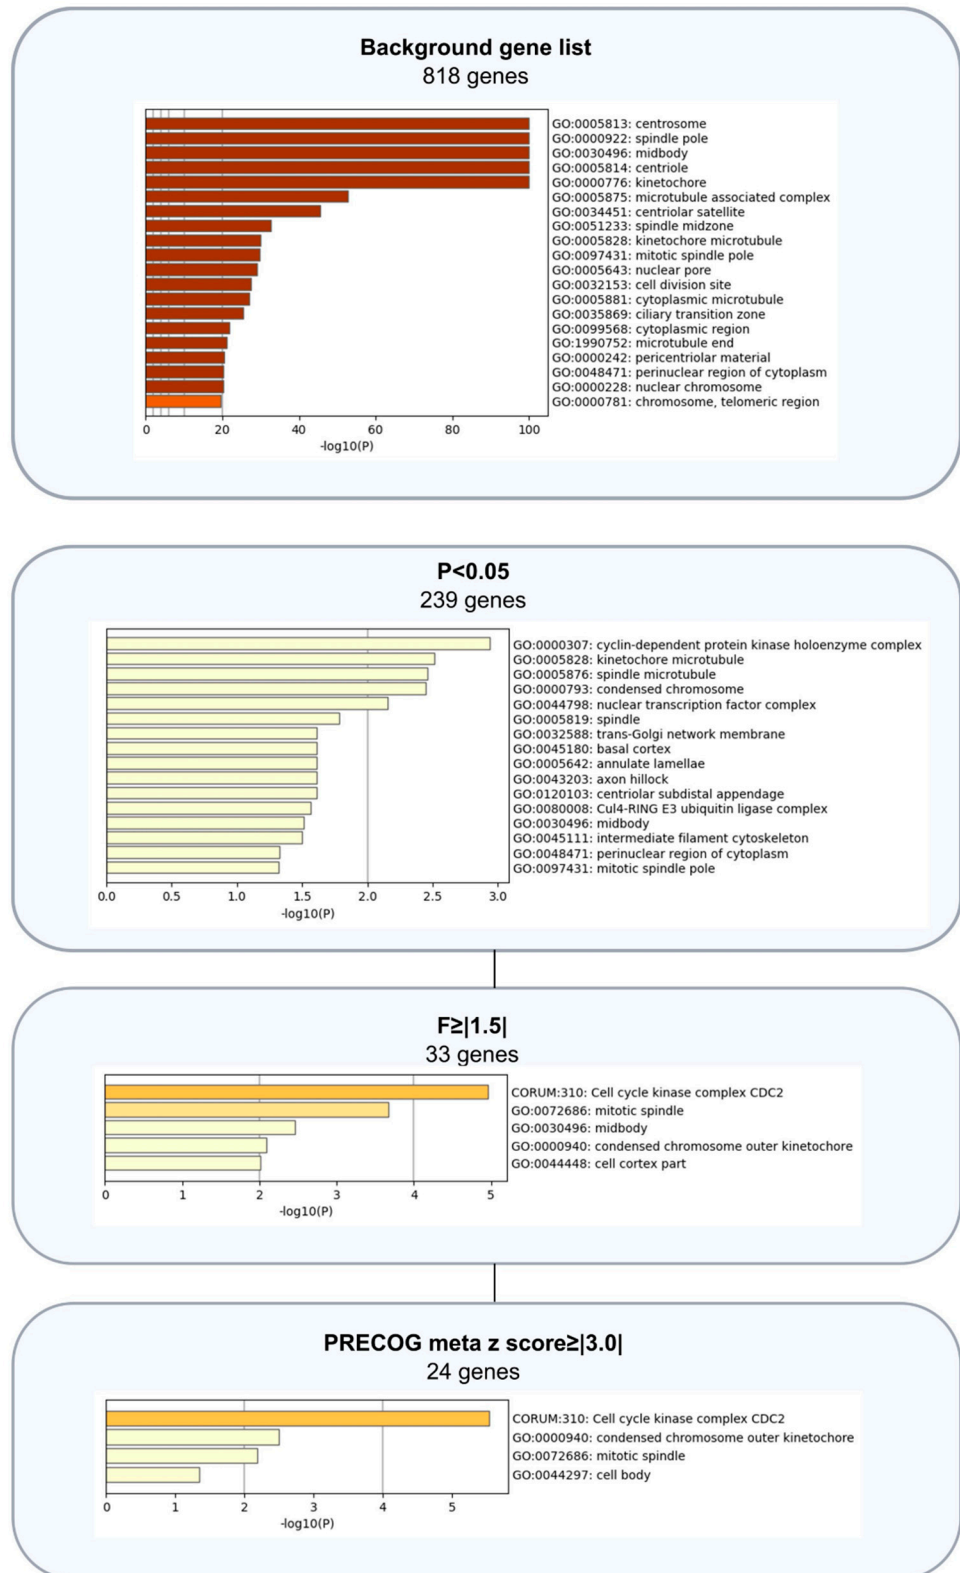

**Figure S2.** Comparison of enrichment analysis of differentially expressed genes (DEGs) from every step of filtering (p-value, FC, and PRECOG filters) and background gene list using Metascape. Bar graph of enriched terms across input gene list, colored by p-values. Results showed that different GO terms were found after every step of filtering (including p-value, FC, and PRECOG filters) when compared to the background list. Therefore, this analysis indicates that there was no bias regarding the primary initial gene list. And the DEGs found were primarily enriched in pathways, cellular components and functions related to the chromosome segregation.

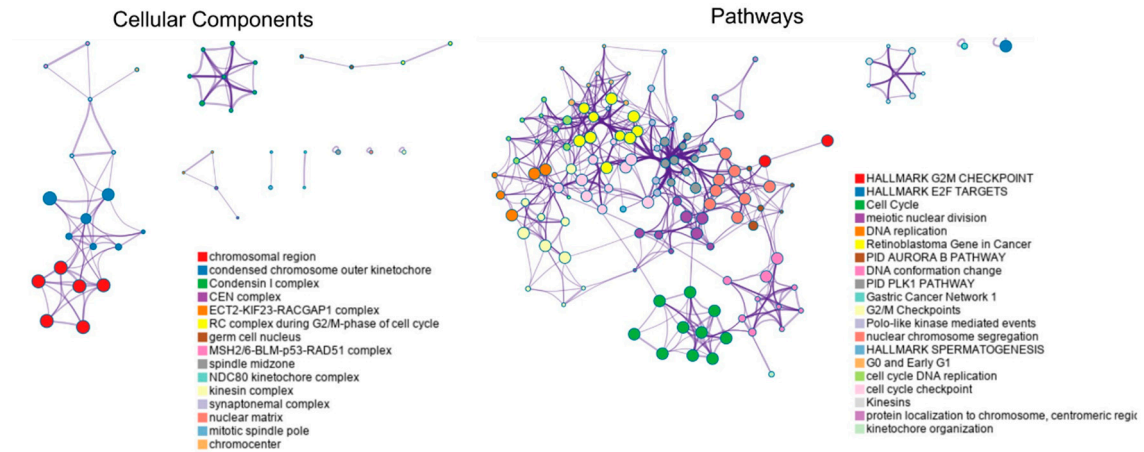

**Figure S3.** Network of enriched terms (from the enrichment of highly co-expressed genes with *CKAP2*) (from Figure 5A) colored by cluster ID, where nodes that share the same cluster ID are typically close to each other.

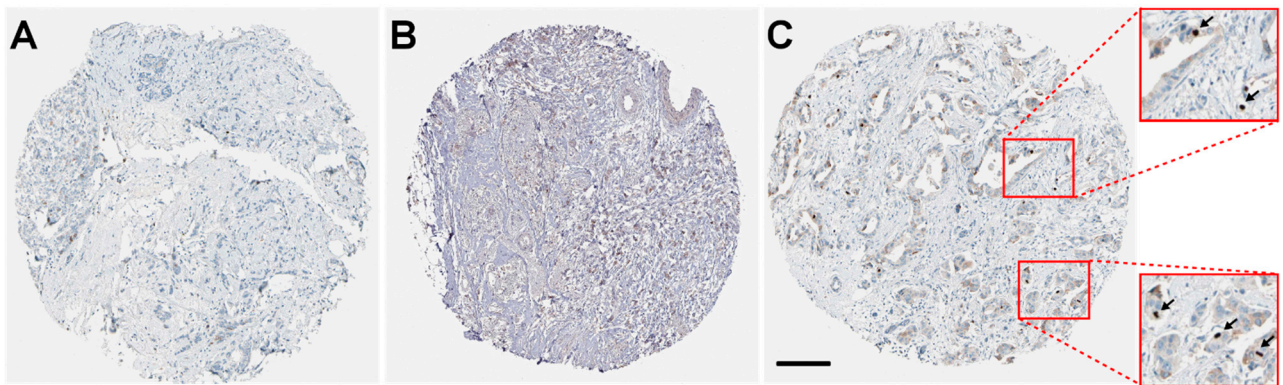

**Figure S4.** Representative images from Human Protein Atlas ([www. https://www.proteinatlas.org](http://www.proteinatlas.org)) showing low (antibody HPA008410) (A), intermediate (antibody HPA027821) (B), and intermediate (antibody HPA008410) (C) stainings with *CKAP2* positive cells in invasive ductal carcinoma (IDC) patients. Insets: Arrows indicate cells with positive *CKAP2* staining. Scale bar: 200  $\mu$ M.

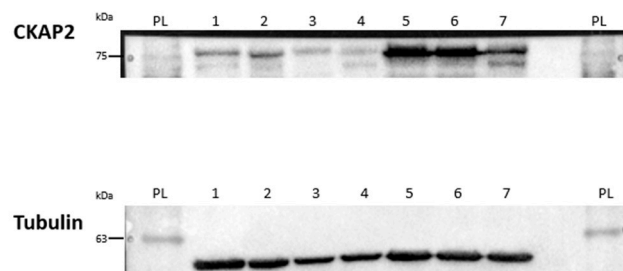

**Figure S5.** Original western blot for the Figure 7D. PL protein ladder; 1: MCF10A, 2: CA1; 3: MCF7 (luminal A); 4: BT474 (luminal B); 5: SKBR3 (HER2+); 6: MDA-MB-231 (TNBC); 7: MDA-MB-468 (TNBC); kDa: kilodaltons.

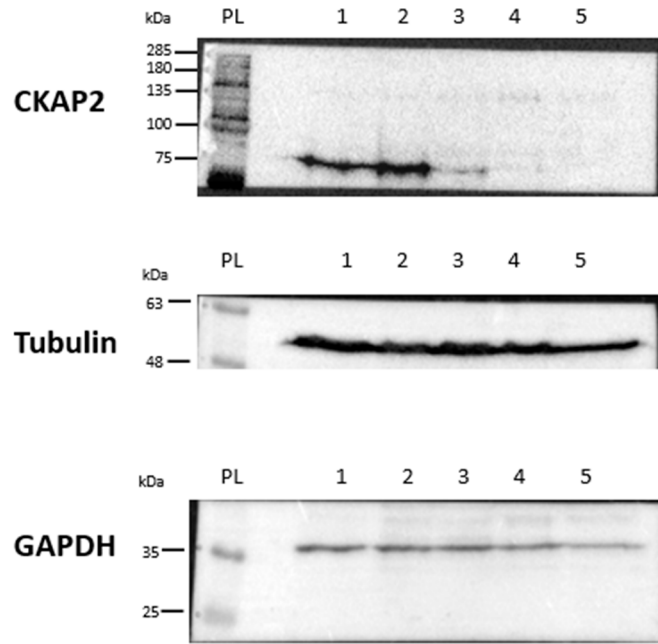

**Figure S6.** Original western blot for Figure 8A. PL: protein ladder; 1: parental cell line (non-transfected); 2: scrambled vector; 3: sh1; 4: sh2; 5: sh3; kDa: kilodaltons.

**Table S1.** Sequence of primers used for RT-qPCR studies.

| Gene         | Forward primer (5'-3')     | Reverse primer (5'-3') |
|--------------|----------------------------|------------------------|
| <i>ASPM</i>  | TCAGAGATGGTTTCGAGCAAGA     | AGCGAAATAGGGCTGCATCA   |
| <i>KIF11</i> | C TGCCAGCAAG CTGCTTAAC     | TGCATTGTGTTGGTCAACTGC  |
| <i>TPX2</i>  | CGGCTAATAACGGTTCTTGATACA   | CAGGCCTACAGGTCTGACTC   |
| <i>CKAP2</i> | CCGTTGACCAGCGAAGACATA      | ACGAGCTTTTCTCTCTTCCGA  |
| <i>GAPDH</i> | CGGGGCTCTCCAGAACATCAT      | ATGCCAGTGAGCTTCCCGTTC  |
| <i>HPRT1</i> | CGTCGTGATTAG-TGATGATGAACCA | ACACCCTTTCCAAATCCTCAGC |

**Table S2.** Gene ontology terms (retrieved from AmiGo) used to select mitotically relevant genes.

| Gene Ontology Identification (GO ID) | Description                                   | Ontology           |
|--------------------------------------|-----------------------------------------------|--------------------|
| GO:0000022                           | mitotic spindle elongation                    | biological_process |
| GO:0000070                           | mitotic sister chromatid segregation          | biological_process |
| GO:0000072                           | obsolete M phase specific microtubule process | biological_process |
| GO:0000073                           | spindle pole body separation                  | biological_process |
| GO:0000075                           | cell cycle checkpoint                         | biological_process |
| GO:0000078                           | obsolete cytokinesis after mitosis checkpoint | biological_process |
| GO:0000086                           | G2/M transition of mitotic cell cycle         | biological_process |
| GO:0000087                           | mitotic M phase                               | biological_process |
| GO:0000088                           | mitotic prophase                              | biological_process |
| GO:0000089                           | mitotic metaphase                             | biological_process |
| GO:0000090                           | mitotic anaphase                              | biological_process |
| GO:0000091                           | mitotic anaphase A                            | biological_process |
| GO:0000092                           | mitotic anaphase B                            | biological_process |
| GO:0000093                           | mitotic telophase                             | biological_process |

|            |                                                                                                      |                    |
|------------|------------------------------------------------------------------------------------------------------|--------------------|
| GO:0000117 | regulation of transcription involved in G2/M transition of mitotic cell cycle                        | biological_process |
| GO:0000132 | establishment of mitotic spindle orientation                                                         | biological_process |
| GO:0000159 | protein phosphatase type 2A complex                                                                  | cellular_component |
| GO:0000164 | protein phosphatase type 1 complex                                                                   | cellular_component |
| GO:0000212 | meiotic spindle organization                                                                         | biological_process |
| GO:0000216 | obsolete M/G1 transition of mitotic cell cycle                                                       | biological_process |
| GO:0000226 | microtubule cytoskeleton organization                                                                | biological_process |
| GO:0000231 | obsolete cytoplasmic mitotic chromosome                                                              | cellular_component |
| GO:0000235 | astral microtubule                                                                                   | cellular_component |
| GO:0000236 | mitotic prometaphase                                                                                 | biological_process |
| GO:0000242 | pericentriolar material                                                                              | cellular_component |
| GO:0000278 | mitotic cell cycle                                                                                   | biological_process |
| GO:0000279 | M phase                                                                                              | biological_process |
| GO:0000280 | nuclear division                                                                                     | biological_process |
| GO:0000281 | mitotic cytokinesis                                                                                  | biological_process |
| GO:0000320 | re-entry into mitotic cell cycle                                                                     | biological_process |
| GO:0000751 | mitotic cell cycle G1 arrest in response to pheromone                                                | biological_process |
| GO:0000775 | chromosome, centromeric region                                                                       | cellular_component |
| GO:0000776 | kinetochore                                                                                          | cellular_component |
| GO:0000777 | condensed chromosome kinetochore                                                                     | cellular_component |
| GO:0000778 | condensed nuclear chromosome kinetochore                                                             | cellular_component |
| GO:0000779 | condensed chromosome, centromeric region                                                             | cellular_component |
| GO:0000780 | condensed nuclear chromosome, centromeric region                                                     | cellular_component |
| GO:0000818 | nuclear MIS12/MIND complex                                                                           | cellular_component |
| GO:0000819 | sister chromatid segregation                                                                         | biological_process |
| GO:0000910 | cytokinesis                                                                                          | biological_process |
| GO:0000911 | cytokinesis by cell plate formation                                                                  | biological_process |
| GO:0000912 | assembly of actomyosin apparatus involved in cytokinesis                                             | biological_process |
| GO:0000915 | actomyosin contractile ring assembly                                                                 | biological_process |
| GO:0000916 | actomyosin contractile ring contraction                                                              | biological_process |
| GO:0000917 | barrier septum assembly                                                                              | biological_process |
| GO:0000918 | barrier septum site selection                                                                        | biological_process |
| GO:0000919 | cell plate assembly                                                                                  | biological_process |
| GO:0000920 | cell separation after cytokinesis                                                                    | biological_process |
| GO:0000921 | septin ring assembly                                                                                 | biological_process |
| GO:0000922 | spindle pole                                                                                         | cellular_component |
| GO:0000923 | equatorial microtubule organizing center                                                             | cellular_component |
| GO:0000924 | gamma-tubulin ring complex, centrosomal                                                              | cellular_component |
| GO:0000927 | gamma-tubulin small complex, centrosomal                                                             | cellular_component |
| GO:0000928 | gamma-tubulin small complex, spindle pole body                                                       | cellular_component |
| GO:0000930 | gamma-tubulin complex                                                                                | cellular_component |
| GO:0000930 | gamma-tubulin complex                                                                                | cellular_component |
| GO:0000931 | gamma-tubulin large complex                                                                          | cellular_component |
| GO:0000940 | condensed chromosome outer kinetochore                                                               | cellular_component |
| GO:0000941 | condensed nuclear chromosome inner kinetochore                                                       | cellular_component |
| GO:0000942 | condensed nuclear chromosome outer kinetochore                                                       | cellular_component |
| GO:0001100 | negative regulation of exit from mitosis                                                             | biological_process |
| GO:0001578 | microtubule bundle formation                                                                         | biological_process |
| GO:0003425 | establishment of mitotic spindle orientation involved in growth plate cartilage chondrocyte division | biological_process |

**Table S3.** All genes with highest Spearman's correlation coefficient ( $r \geq 0.5$ ) predicted to co-express with CKAP2. Genes with an asterisk (which comprise 16 genes) are also present in the 24 mitotically relevant gene list. The q-value is derived from Benjamini-Hochberg FDR correction procedure.

|    | Gene Symbol      | Cytoband | Spearman's Correlation | p-Value   | q-Value   |
|----|------------------|----------|------------------------|-----------|-----------|
| 1  | <i>DIAPH3</i>    | 13q21.2  | 0.739389854            | 1.27E-172 | 2.54E-168 |
| 2  | <i>BORA</i>      | 13q21.33 | 0.731464545            | 3.78E-167 | 3.78E-163 |
| 3  | <i>CKAP2L</i>    | 2q14.1   | 0.689512954            | 3.87E-141 | 2.58E-137 |
| 4  | <i>BRCA2</i>     | 13q13.1  | 0.687867544            | 3.29E-140 | 1.65E-136 |
| 5  | <i>ASPM*</i>     | 1q31.3   | 0.679105968            | 2.32E-135 | 9.29E-132 |
| 6  | <i>KNL1</i>      | 15q15.1  | 0.674458017            | 7.39E-133 | 2.47E-129 |
| 7  | <i>ARHGAP11A</i> | 15q13.3  | 0.669955242            | 1.78E-130 | 5.10E-127 |
| 8  | <i>BUB1</i>      | 2q13     | 0.66822039             | 1.44E-129 | 3.60E-126 |
| 9  | <i>RFC3</i>      | 13q13.2  | 0.667922988            | 2.05E-129 | 4.57E-126 |
| 10 | <i>KIF11*</i>    | 10q23.33 | 0.66342863             | 4.26E-127 | 8.54E-124 |
| 11 | <i>ECT2*</i>     | 3q26.31  | 0.661963278            | 2.38E-126 | 4.33E-123 |
| 12 | <i>SGO2</i>      | 2q33.1   | 0.661022354            | 7.14E-126 | 1.19E-122 |
| 13 | <i>MKI67*</i>    | 10q26.2  | 0.660220461            | 1.82E-125 | 2.80E-122 |
| 14 | <i>DLGAP5</i>    | 14q22.3  | 0.659368342            | 4.89E-125 | 6.99E-122 |
| 15 | <i>BUB1B</i>     | 15q15.1  | 0.658250777            | 1.78E-124 | 2.38E-121 |
| 16 | <i>KIF23*</i>    | 15q23    | 0.657140181            | 6.39E-124 | 8.00E-121 |
| 17 | <i>KIF14</i>     | 1q32.1   | 0.65321807             | 5.59E-122 | 6.59E-119 |
| 18 | <i>ANLN*</i>     | 7p14.2   | 0.651426238            | 4.22E-121 | 4.70E-118 |
| 19 | <i>CIP2A</i>     | 3q13.13  | 0.65101644             | 6.69E-121 | 7.05E-118 |
| 20 | <i>PRR11</i>     | 17q22    | 0.649728789            | 2.83E-120 | 2.83E-117 |
| 21 | <i>SGO1</i>      | 3p24.3   | 0.646315057            | 1.25E-118 | 1.19E-115 |
| 22 | <i>SKA3</i>      | 13q12.11 | 0.644899156            | 5.93E-118 | 5.40E-115 |
| 23 | <i>TTK</i>       | 6q14.1   | 0.643244495            | 3.62E-117 | 3.15E-114 |
| 24 | <i>RACGAP1</i>   | 12q13.12 | 0.642394775            | 9.13E-117 | 7.62E-114 |
| 25 | <i>GAS2L3</i>    | 12q23.1  | 0.642202897            | 1.12E-116 | 9.01E-114 |
| 26 | <i>CCNA2*</i>    | 4q27     | 0.640527147            | 6.90E-116 | 5.31E-113 |
| 27 | <i>DEPDC1</i>    | 1p31.3   | 0.64047746             | 7.28E-116 | 5.40E-113 |
| 28 | <i>CENPF*</i>    | 1q41     | 0.640325562            | 8.57E-116 | 6.13E-113 |
| 29 | <i>KIF15</i>     | 3p21.31  | 0.638416389            | 6.67E-115 | 4.60E-112 |
| 30 | <i>CENPE</i>     | 4q24     | 0.635192431            | 2.06E-113 | 1.38E-110 |
| 31 | <i>KIF20B</i>    | 10q23.31 | 0.635139865            | 2.18E-113 | 1.41E-110 |
| 32 | <i>STIL</i>      | 1p33     | 0.633722239            | 9.72E-113 | 6.08E-110 |
| 33 | <i>CENPI</i>     | Xq22.1   | 0.632441761            | 3.73E-112 | 2.26E-109 |
| 34 | <i>HMMR</i>      | 5q34     | 0.631166892            | 1.41E-111 | 8.31E-109 |
| 35 | <i>SMC2</i>      | 9q31.1   | 0.629679349            | 6.62E-111 | 3.79E-108 |
| 36 | <i>NUSAP1*</i>   | 15q14    | 0.629128983            | 1.17E-110 | 6.52E-108 |
| 37 | <i>KIF18A</i>    | 11p14.1  | 0.623139608            | 5.37E-108 | 2.91E-105 |
| 38 | <i>PLK4</i>      | 4q28.1   | 0.621343946            | 3.29E-107 | 1.73E-104 |
| 39 | <i>ARHGAP11B</i> | 15q13.2  | 0.620381771            | 8.64E-107 | 4.44E-104 |
| 40 | <i>CEP55</i>     | 10q23.33 | 0.620097211            | 1.15E-106 | 5.75E-104 |
| 41 | <i>TOP2A*</i>    | 17q21.2  | 0.618861309            | 3.95E-106 | 1.93E-103 |
| 42 | <i>FAM83D</i>    | 20q11.23 | 0.618378557            | 6.39E-106 | 3.05E-103 |
| 43 | <i>FBXO5</i>     | 6q25.2   | 0.618157622            | 7.95E-106 | 3.71E-103 |
| 44 | <i>HASPIN</i>    | 17p13.2  | 0.614756758            | 2.29E-104 | 1.04E-101 |
| 45 | <i>KIF20A</i>    | 5q31.2   | 0.614647071            | 2.55E-104 | 1.14E-101 |
| 46 | <i>POLQ</i>      | 3q13.33  | 0.614622911            | 2.61E-104 | 1.14E-101 |
| 47 | <i>NCAPH</i>     | 2q11.2   | 0.611148413            | 7.74E-103 | 3.30E-100 |
| 48 | <i>RAD51AP1</i>  | 12p13.32 | 0.609585426            | 3.51E-102 | 1.46E-99  |

|     |                |               |             |           |          |
|-----|----------------|---------------|-------------|-----------|----------|
| 49  | <i>CLSPN</i>   | 1p34.3        | 0.609426832 | 4.09E-102 | 1.67E-99 |
| 50  | <i>ERCC6L</i>  | Xq13.1        | 0.608591958 | 9.12E-102 | 3.65E-99 |
| 51  | <i>PROSER1</i> | 13q13.3       | 0.608276456 | 1.23E-101 | 4.85E-99 |
| 52  | <i>NCAPG</i>   | 4p15.31       | 0.607953978 | 1.68E-101 | 6.48E-99 |
| 53  | <i>PARPBP</i>  | 12q23.2       | 0.605995083 | 1.09E-100 | 4.13E-98 |
| 54  | <i>XPO1</i>    | 2p15          | 0.60593109  | 1.16E-100 | 4.31E-98 |
| 55  | <i>TPX2*</i>   | 20q11.21      | 0.605908644 | 1.19E-100 | 4.32E-98 |
| 56  | <i>SMC4</i>    | 3q25.33       | 0.605632106 | 1.54E-100 | 5.52E-98 |
| 57  | <i>TMPO</i>    | 12q23.1       | 0.605161846 | 2.41E-100 | 8.47E-98 |
| 58  | <i>SKP2</i>    | 5p13.2        | 0.604133634 | 6.38E-100 | 2.20E-97 |
| 59  | <i>DEPDC1B</i> | 5q12.1        | 0.601143896 | 1.06E-98  | 3.59E-96 |
| 60  | <i>KPNA3</i>   | 13q14.2       | 0.60113141  | 1.07E-98  | 3.59E-96 |
| 61  | <i>E2F8</i>    | 11p15.1       | 0.599066399 | 7.36E-98  | 2.42E-95 |
| 62  | <i>MELK</i>    | 9p13.2        | 0.59884826  | 9.02E-98  | 2.91E-95 |
| 63  | <i>NEIL3</i>   | 4q34.3        | 0.597597988 | 2.87E-97  | 9.12E-95 |
| 64  | <i>E2F7</i>    | 12q21.2       | 0.596425358 | 8.46E-97  | 2.65E-94 |
| 65  | <i>MCM10</i>   | 10p13         | 0.595803438 | 1.50E-96  | 4.62E-94 |
| 66  | <i>KIF4A</i>   | Xq13.1        | 0.594215531 | 6.41E-96  | 1.94E-93 |
| 67  | <i>OBI1</i>    | 13q31.1       | 0.593513869 | 1.21E-95  | 3.63E-93 |
| 68  | <i>MAD2L1</i>  | 4q27          | 0.590758337 | 1.48E-94  | 4.35E-92 |
| 69  | <i>NCAPD2</i>  | 12p13.31      | 0.586686765 | 5.66E-93  | 1.64E-90 |
| 70  | <i>PRC1</i>    | 15q26.1       | 0.585499772 | 1.62E-92  | 4.64E-90 |
| 71  | <i>CDCA2</i>   | 8p21.2        | 0.584605136 | 3.58E-92  | 1.01E-89 |
| 72  | <i>NDC80</i>   | 18p11.32      | 0.584152403 | 5.33E-92  | 1.48E-89 |
| 73  | <i>FAM72A</i>  | 1q32.1        | 0.581835733 | 4.07E-91  | 1.12E-88 |
| 74  | <i>BLM</i>     | 15q26.1       | 0.581360096 | 6.17E-91  | 1.67E-88 |
| 75  | <i>LMNB1</i>   | 5q23.2        | 0.580766813 | 1.04E-90  | 2.77E-88 |
| 76  | <i>HJURP</i>   | 2q37.1        | 0.580501216 | 1.30E-90  | 3.44E-88 |
| 77  | <i>SPDL1</i>   | 5q35.1        | 0.57988857  | 2.22E-90  | 5.78E-88 |
| 78  | <i>CDK1*</i>   | 10q21.2       | 0.57975559  | 2.49E-90  | 6.41E-88 |
| 79  | <i>MSH2</i>    | 2p21-p16.3    | 0.579332123 | 3.60E-90  | 9.13E-88 |
| 80  | <i>TFDP1</i>   | 13q34         | 0.577764232 | 1.40E-89  | 3.50E-87 |
| 81  | <i>CCNB2*</i>  | 15q22.2       | 0.577069174 | 2.54E-89  | 6.28E-87 |
| 82  | <i>ZNF367</i>  | 9q22.32       | 0.57653025  | 4.04E-89  | 9.86E-87 |
| 83  | <i>GEN1</i>    | 2p24.2        | 0.576482891 | 4.21E-89  | 1.01E-86 |
| 84  | <i>WDHD1</i>   | 14q22.2-q22.3 | 0.575512545 | 9.66E-89  | 2.30E-86 |
| 85  | <i>ESCO2</i>   | 8p21.1        | 0.573885031 | 3.87E-88  | 9.12E-86 |
| 86  | <i>GPR180</i>  | 13q32.1       | 0.571960762 | 1.98E-87  | 4.61E-85 |
| 87  | <i>FOXM1*</i>  | 12p13.33      | 0.570430803 | 7.18E-87  | 1.65E-84 |
| 88  | <i>GPSM2</i>   | 1p13.3        | 0.567234154 | 1.04E-85  | 2.37E-83 |
| 89  | <i>FANCD2</i>  | 3p25.3        | 0.567150825 | 1.11E-85  | 2.51E-83 |
| 90  | <i>CDCA8</i>   | 1p34.3        | 0.563824086 | 1.74E-84  | 3.88E-82 |
| 91  | <i>NCAPG2</i>  | 7q36.3        | 0.56201332  | 7.68E-84  | 1.69E-81 |
| 92  | <i>CIT</i>     | 12q24.23      | 0.561810426 | 9.06E-84  | 1.95E-81 |
| 93  | <i>GTSE1</i>   | 22q13.31      | 0.561805491 | 9.10E-84  | 1.95E-81 |
| 94  | <i>FANCB</i>   | Xp22.2        | 0.561798668 | 9.15E-84  | 1.95E-81 |
| 95  | <i>CDK8</i>    | 13q12.13      | 0.560414734 | 2.82E-83  | 5.95E-81 |
| 96  | <i>ATAD2</i>   | 8q24.13       | 0.559943309 | 4.14E-83  | 8.63E-81 |
| 97  | <i>CENPO</i>   | 2p23.3        | 0.559565285 | 5.62E-83  | 1.16E-80 |
| 98  | <i>NUF2</i>    | 1q23.3        | 0.559465221 | 6.09E-83  | 1.25E-80 |
| 99  | <i>DBF4</i>    | 7q21.12       | 0.557288942 | 3.53E-82  | 7.14E-80 |
| 100 | <i>KIF4B</i>   | 5q33.2        | 0.556219785 | 8.31E-82  | 1.67E-79 |

|     |                 |                 |             |          |          |
|-----|-----------------|-----------------|-------------|----------|----------|
| 101 | <i>SKA1</i>     | 18q21.1         | 0.555334833 | 1.69E-81 | 3.35E-79 |
| 102 | <i>CENPJ</i>    | 13q12.12-q12.13 | 0.554848172 | 2.49E-81 | 4.88E-79 |
| 103 | <i>TICRR</i>    | 15q26.1         | 0.554714678 | 2.77E-81 | 5.38E-79 |
| 104 | <i>CENPA</i>    | 2p23.3          | 0.554555651 | 3.14E-81 | 6.05E-79 |
| 105 | <i>CCNB1*</i>   | 5q13.2          | 0.553924469 | 5.19E-81 | 9.90E-79 |
| 106 | <i>RAP2A</i>    | 13q32.1         | 0.551021598 | 5.15E-80 | 9.73E-78 |
| 107 | <i>DNA2</i>     | 10q21.3         | 0.54983991  | 1.30E-79 | 2.44E-77 |
| 108 | <i>KPNA2</i>    | 17q24.2         | 0.549533989 | 1.65E-79 | 3.07E-77 |
| 109 | <i>MZT1</i>     | 13q21.33        | 0.549015699 | 2.48E-79 | 4.56E-77 |
| 110 | <i>NEK2</i>     | 1q32.3          | 0.548945138 | 2.62E-79 | 4.78E-77 |
| 111 | <i>AURKA</i>    | 20q13.2         | 0.548327397 | 4.25E-79 | 7.66E-77 |
| 112 | <i>INCENP</i>   | 11q12.3         | 0.547638476 | 7.26E-79 | 1.30E-76 |
| 113 | <i>FAM72B</i>   | 1p11.2          | 0.546989528 | 1.20E-78 | 2.13E-76 |
| 114 | <i>EXO1</i>     | 1q43            | 0.546866004 | 1.32E-78 | 2.33E-76 |
| 115 | <i>SUV39H2</i>  | 10p13           | 0.545962149 | 2.66E-78 | 4.64E-76 |
| 116 | <i>CCNE2</i>    | 8q22.1          | 0.544474196 | 8.40E-78 | 1.45E-75 |
| 117 | <i>PLK1*</i>    | 16p12.2         | 0.54420365  | 1.03E-77 | 1.77E-75 |
| 118 | <i>FANCI</i>    | 15q26.1         | 0.543443703 | 1.85E-77 | 3.15E-75 |
| 119 | <i>MIS18BP1</i> | 14q21.2         | 0.543065141 | 2.48E-77 | 4.17E-75 |
| 120 | <i>TOPBP1</i>   | 3q22.1          | 0.540631348 | 1.59E-76 | 2.65E-74 |
| 121 | <i>FAM72D</i>   | 1q21.1          | 0.540580885 | 1.65E-76 | 2.73E-74 |
| 122 | <i>KIF2C</i>    | 1p34.1          | 0.54052975  | 1.71E-76 | 2.81E-74 |
| 123 | <i>RBL1</i>     | 20q11.23        | 0.540334399 | 1.99E-76 | 3.24E-74 |
| 124 | <i>ZWILCH</i>   | 15q22.31        | 0.539724819 | 3.15E-76 | 5.09E-74 |
| 125 | <i>NUDT15</i>   | 13q14.2         | 0.539159859 | 4.84E-76 | 7.75E-74 |
| 126 | <i>PRIM2</i>    | 6p11.2          | 0.537959612 | 1.20E-75 | 1.90E-73 |
| 127 | <i>SRPK1</i>    | 6p21.31         | 0.537734726 | 1.42E-75 | 2.23E-73 |
| 128 | <i>SHCBP1</i>   | 16q11.2         | 0.536060786 | 4.97E-75 | 7.78E-73 |
| 129 | <i>FAM111B</i>  | 11q12.1         | 0.534548352 | 1.54E-74 | 2.39E-72 |
| 130 | <i>CDC25A</i>   | 3p21.31         | 0.532677936 | 6.16E-74 | 9.49E-72 |
| 131 | <i>NEMP1</i>    | 12q13.3         | 0.530795413 | 2.47E-73 | 3.77E-71 |
| 132 | <i>ORC1</i>     | 1p32.3          | 0.528799877 | 1.06E-72 | 1.61E-70 |
| 133 | <i>CKAP5</i>    | 11p11.2         | 0.528088021 | 1.79E-72 | 2.69E-70 |
| 134 | <i>RTKN2</i>    | 10q21.2         | 0.527653305 | 2.45E-72 | 3.67E-70 |
| 135 | <i>RFWD3</i>    | 16q23.1         | 0.527327572 | 3.11E-72 | 4.61E-70 |
| 136 | <i>TRIP13</i>   | 5p15.33         | 0.527256078 | 3.27E-72 | 4.82E-70 |
| 137 | <i>MCM4</i>     | 8q11.21         | 0.526968526 | 4.03E-72 | 5.90E-70 |
| 138 | <i>ESPL1</i>    | 12q13.13        | 0.52695666  | 4.07E-72 | 5.91E-70 |
| 139 | <i>BRIP1</i>    | 17q23.2         | 0.524039635 | 3.34E-71 | 4.82E-69 |
| 140 | <i>SPC25</i>    | 2q31.1          | 0.52400746  | 3.42E-71 | 4.90E-69 |
| 141 | <i>TTF2</i>     | 1p13.1          | 0.522701328 | 8.73E-71 | 1.24E-68 |
| 142 | <i>ATAD5</i>    | 17q11.2         | 0.520333009 | 4.72E-70 | 6.66E-68 |
| 143 | <i>CEP152</i>   | 15q21.1         | 0.519810768 | 6.83E-70 | 9.57E-68 |
| 144 | <i>MSH6</i>     | 2p16.3          | 0.518259575 | 2.05E-69 | 2.83E-67 |
| 145 | <i>MTBP</i>     | 8q24.12         | 0.517085901 | 4.67E-69 | 6.41E-67 |
| 146 | <i>CENPN</i>    | 16q23.2         | 0.515863685 | 1.10E-68 | 1.50E-66 |
| 147 | <i>IPO5</i>     | 13q32.2         | 0.515793854 | 1.15E-68 | 1.56E-66 |
| 148 | <i>FIGNL1</i>   | 7p12.2          | 0.515141344 | 1.82E-68 | 2.45E-66 |
| 149 | <i>PBK</i>      | 8p21.1          | 0.514318772 | 3.23E-68 | 4.30E-66 |
| 150 | <i>DSCC1</i>    | 8q24.12         | 0.514312125 | 3.24E-68 | 4.30E-66 |
| 151 | <i>CENPL</i>    | 1q25.1          | 0.511570814 | 2.17E-67 | 2.85E-65 |
| 152 | <i>MTFR2</i>    | 6q23.3          | 0.510972342 | 3.27E-67 | 4.28E-65 |



|     |                |          |             |          |          |
|-----|----------------|----------|-------------|----------|----------|
| 153 | <i>TUBGCP3</i> | 13q34    | 0.510923528 | 3.38E-67 | 4.40E-65 |
| 154 | <i>IQGAP3</i>  | 1q22     | 0.50983203  | 7.15E-67 | 9.25E-65 |
| 155 | <i>HELLS</i>   | 10q23.33 | 0.508473582 | 1.81E-66 | 2.33E-64 |
| 156 | <i>MCM8</i>    | 20p12.3  | 0.507948467 | 2.59E-66 | 3.28E-64 |
| 157 | <i>SMC1A</i>   | Xp11.22  | 0.505622081 | 1.26E-65 | 1.58E-63 |
| 158 | <i>SPAG5</i>   | 17q11.2  | 0.50554846  | 1.32E-65 | 1.65E-63 |
| 159 | <i>GIN51</i>   | 20p11.21 | 0.505097396 | 1.79E-65 | 2.23E-63 |
| 160 | <i>DDIAS</i>   | 11q14.1  | 0.504948741 | 1.98E-65 | 2.45E-63 |
| 161 | <i>XRCC2</i>   | 7q36.1   | 0.50390581  | 3.99E-65 | 4.91E-63 |
| 162 | <i>XPO5</i>    | 6p21.1   | 0.502598994 | 9.59E-65 | 1.17E-62 |
| 163 | <i>LIN9</i>    | 1q42.12  | 0.502530167 | 1.00E-64 | 1.22E-62 |
| 164 | <i>NUP205</i>  | 7q33     | 0.501012747 | 2.76E-64 | 3.33E-62 |
